# Supplementary material for: Intermolecular hydrogen bonds between catechin and theanine in tea: slow release of the antioxidant capacity by a synergetic effect
Source: Royal Society of Chemistry journal article supplement (doi:10.1039/d2ra03692d), 2022-01-01
Supplement: d2ra03692d1.pdf [file d2ra03692d1.pdf]

## Intermolecular Hydrogen bonds between Catechin and Theanine in Tea: Slow Release of the Antioxidant Capacity by Synergetic Effect

Yirong Xia<sup>1</sup>, Wei Ni<sup>2</sup>, Xintong Wang<sup>1</sup>, Yanyan Wang<sup>1</sup>, Ximing Huang<sup>\*1</sup>

<sup>1</sup> School of Food and Chemical Engineering, Shaoyang University, Shaoyang, 422000, China.

<sup>2</sup> Beijing Aerospace Propulsion Institute, Beijing, 100076, China.

\* Corresponding author: Ximing Huang, E-mail address: Ximinghuang\_SYU@163.com

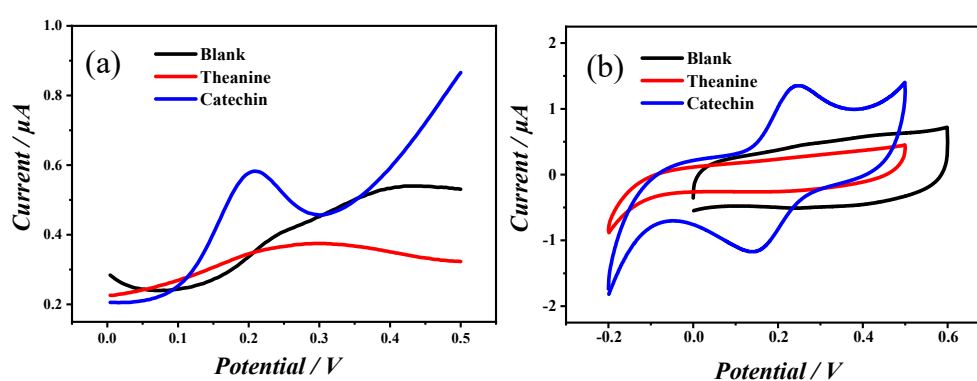

Figure S1. (a) Differential pulse voltammograms of blank solution, 1 mM theanine and 1 mM catechin, scan rate:  $0.1 \text{ V}\cdot\text{s}^{-1}$ . (b) Cyclic voltammograms of blank solution, 1 mM theanine and 1mM catechin, scan rate:  $0.1 \text{ V}\cdot\text{s}^{-1}$ .

### 1. Preparation method of catechin solution

First prepared 0.1 M PBS buffer solution (disodium phosphate, sodium dihydrogen phosphate), then HCl and NaOH were used to adjust the pH of PBS, finally, prepared a catechin or theanine solution with a PBS buffer solution that has been adjusted for pH.
